# Supplementary material for: One-dimensional lead iodide hybrid stabilized by inorganic hexarhenium cluster cations as a new broad-band emitter
Source: Royal Society of Chemistry journal article supplement (doi:10.1039/d1ra04170c), 2021-01-01
Supplement: d1ra04170c1.pdf [file d1ra04170c1.pdf]

*Supporting information*

**One-dimensional lead iodide hybrid stabilized by inorganic  
hexarhenium cluster cations as new broad band emitter**

Giang Thi Ly†, Jun Choit, Youngmee Kim, Yuna Kim, Sujin Kim, Sohyeon Yang, and Sung-Jin Kim\*

*Department of Chemistry and Nanoscience, Ewha Womans University, Seoul, 03760, Republic of Korea*

---

† These authors contributed equally.

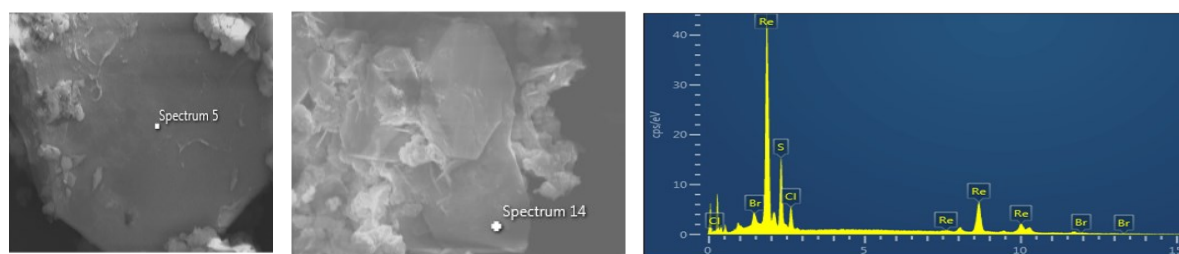

| Element | Atomic % | Ratio |
|---------|----------|-------|
| S       | 44.02    | 6.4   |
| Cl      | 14.17    | 2.1   |
| Re      | 41.04    | 6.0   |

Fig. S1. EDS determination of  $[\text{Re}_6\text{S}_8(\text{PzH})_6]\text{Cl}_2$  (I)

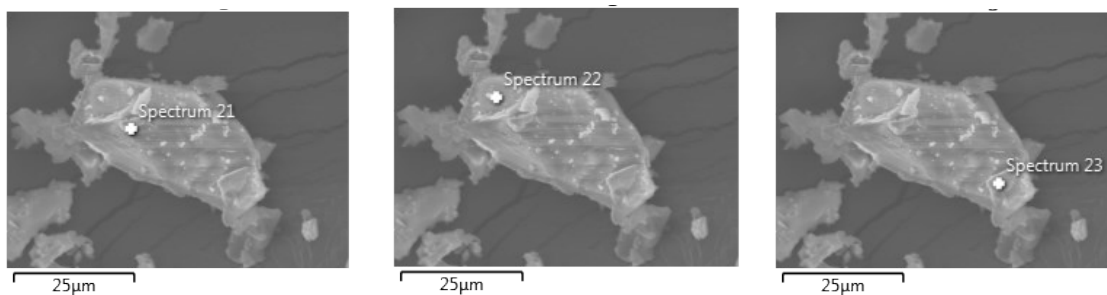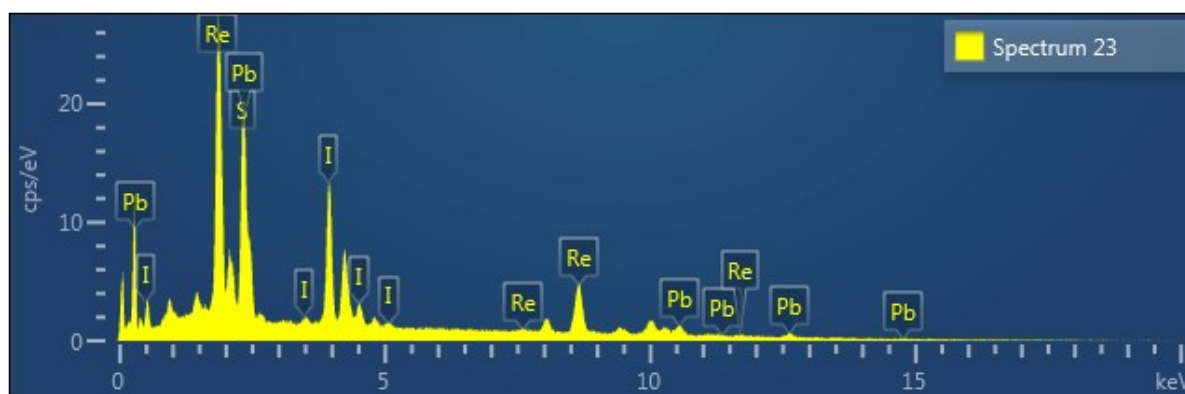

| Element   | Atomic % | Ratio |
|-----------|----------|-------|
| <b>S</b>  | 33.13    | 8.3   |
| <b>I</b>  | 29.90    | 7.5   |
| <b>Re</b> | 24.08    | 6.0   |
| <b>Pb</b> | 12.89    | 3.2   |

Fig. S2. EDS analysis confirms the presence of the constituent elements in the  $\{[\text{Re}_6\text{S}_8(\text{PzH})_6][\text{Pb}_3\text{I}_8(\text{DMF})_2]\} \cdot 6(\text{DMF})$  (**II**).

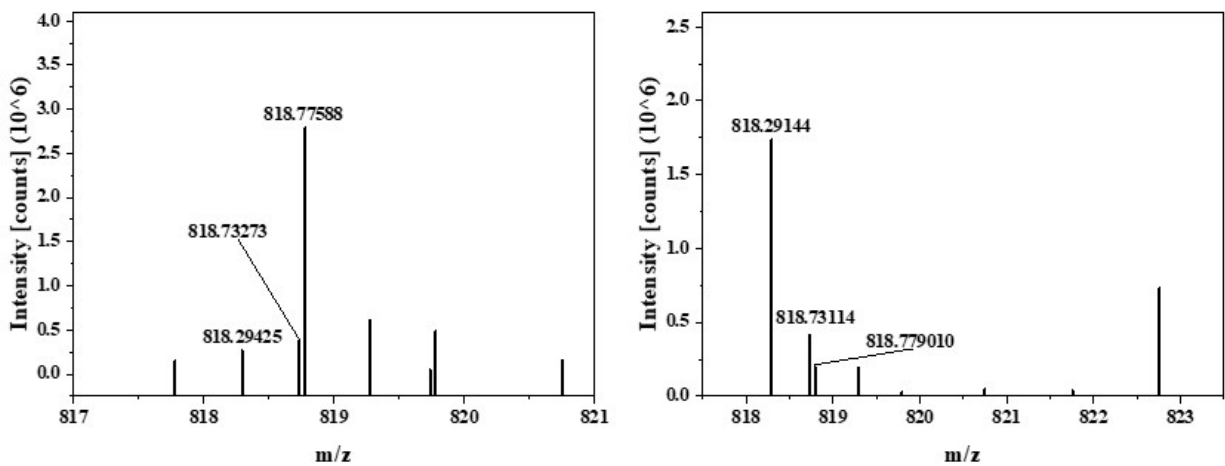

Fig. S3. LC-MS (negative mode) of **II** contains a few sets of intense peaks in the area  $m/z$  818-819. The most intense peak can be attributed to the  $[\text{Pb}_3\text{I}_8]^{2-}$  anion ( $m/z = 818.42$ ).

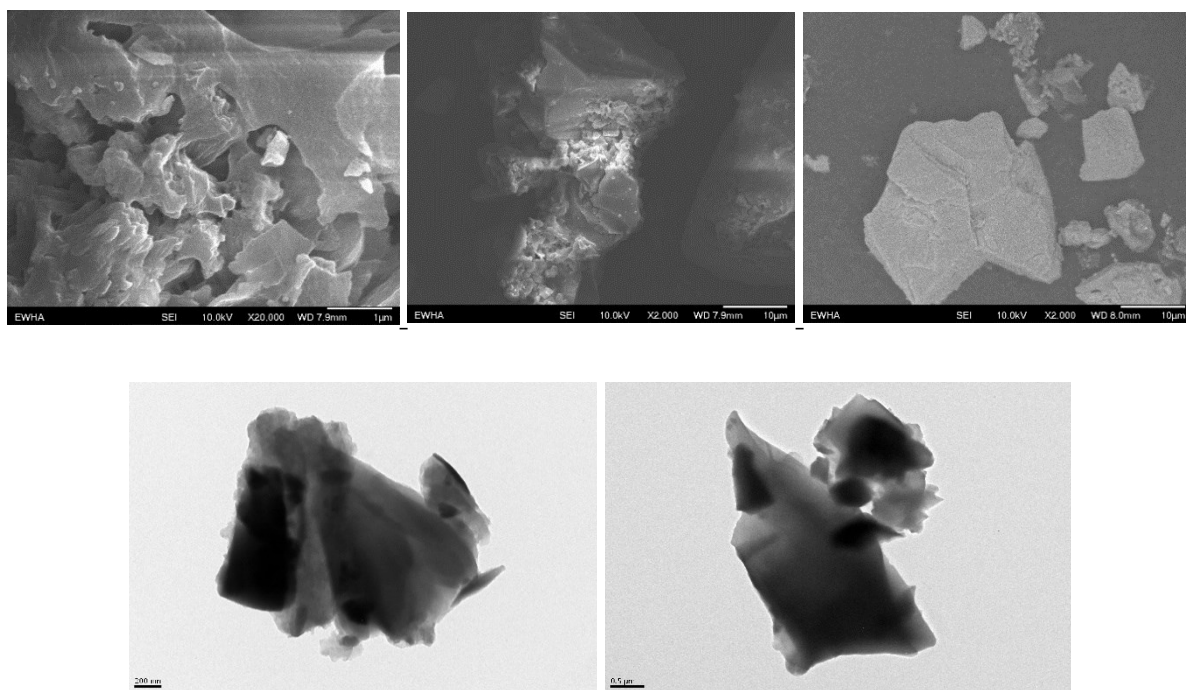

Fig. S4. SEM images of  $[\text{Re}_6\text{S}_8(\text{PzH})_6]\text{Cl}_2$  (**I**).

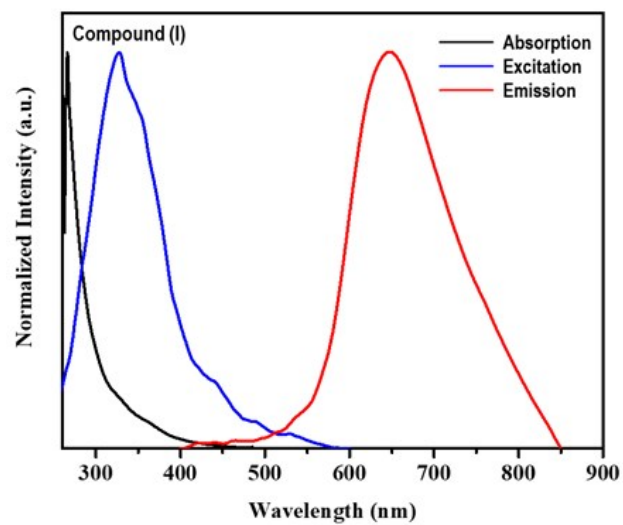

Fig. S5. Absorption, excitation and emission of **I** in DMF solution.

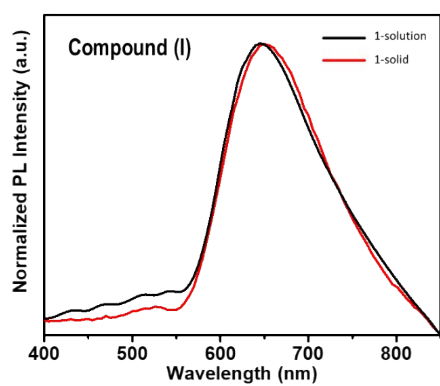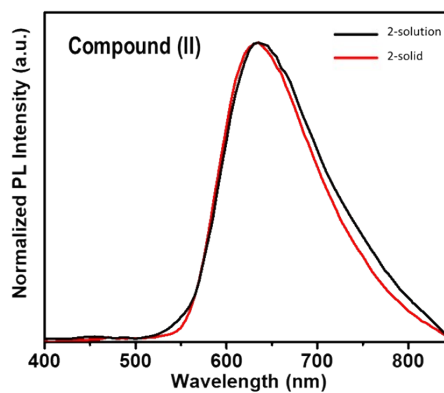

Fig. S6. Emission spectra of **I** and **II** in solid state and in DMF solution.

Table S1. Selected bond lengths of **I**.

---

|             |           |
|-------------|-----------|
| Re(1)-N(1)  | 2.144(12) |
| Re(1)-S(1)  | 2.422(3)  |
| Re(1)-S(8)  | 2.422(3)  |
| Re(1)-S(2)  | 2.429(3)  |
| Re(1)-S(7)  | 2.433(3)  |
| Re(1)-Re(4) | 2.5815(7) |
| Re(1)-Re(6) | 2.5818(7) |
| Re(1)-Re(5) | 2.5829(7) |
| Re(1)-Re(2) | 2.5919(8) |
| Re(2)-N(3)  | 2.192(12) |
| Re(2)-S(4)  | 2.423(3)  |
| Re(2)-S(2)  | 2.428(3)  |
| Re(2)-S(1)  | 2.428(3)  |
| Re(2)-S(3)  | 2.436(3)  |
| Re(2)-Re(3) | 2.5813(7) |
| Re(2)-Re(6) | 2.5884(7) |
| Re(2)-Re(5) | 2.5896(7) |
| Re(3)-N(5)  | 2.158(11) |
| Re(3)-S(6)  | 2.422(3)  |
| Re(3)-S(3)  | 2.427(3)  |
| Re(3)-S(5)  | 2.430(3)  |

|             |           |
|-------------|-----------|
| Re(3)-S(4)  | 2.431(3)  |
| Re(3)-Re(5) | 2.5882(7) |
| Re(3)-Re(4) | 2.5908(7) |
| Re(3)-Re(6) | 2.5948(7) |
| Re(4)-N(7)  | 2.157(12) |
| Re(4)-S(8)  | 2.424(3)  |
| Re(4)-S(6)  | 2.424(3)  |
| Re(4)-S(5)  | 2.427(3)  |
| Re(4)-S(7)  | 2.435(3)  |
| Re(4)-Re(6) | 2.5821(7) |
| Re(4)-Re(5) | 2.5885(7) |
| Re(5)-N(9)  | 2.146(11) |
| Re(5)-S(1)  | 2.422(3)  |
| Re(5)-S(6)  | 2.423(3)  |
| Re(5)-S(7)  | 2.428(3)  |
| Re(5)-S(4)  | 2.431(3)  |
| Re(6)-N(11) | 2.169(11) |
| Re(6)-S(5)  | 2.411(3)  |
| Re(6)-S(8)  | 2.416(3)  |
| Re(6)-S(3)  | 2.424(3)  |
| Re(6)-S(2)  | 2.426(3)  |

---

Table S2. Selected bond lengths of **II**.

---

|               |           |
|---------------|-----------|
| Re(1)-N(11)   | 2.159(8)  |
| Re(1)-S(1)    | 2.408(2)  |
| Re(1)-S(2)    | 2.413(2)  |
| Re(1)-S(4)    | 2.414(2)  |
| Re(1)-S(3)    | 2.414(2)  |
| Re(1)-Re(2)#1 | 2.5856(5) |
| Re(1)-Re(3)#1 | 2.5875(5) |
| Re(1)-Re(2)   | 2.5899(5) |
| Re(1)-Re(3)   | 2.5916(5) |
| Re(2)-N(21)   | 2.150(8)  |
| Re(2)-S(3)#1  | 2.406(2)  |
| Re(2)-S(4)#1  | 2.410(2)  |
| Re(2)-S(1)    | 2.410(2)  |
| Re(2)-S(2)    | 2.421(2)  |
| Re(2)-Re(1)#1 | 2.5856(5) |
| Re(2)-Re(3)   | 2.5871(5) |
| Re(2)-Re(3)#1 | 2.5875(5) |
| Re(3)-N(31)   | 2.144(9)  |
| Re(3)-S(1)#1  | 2.403(2)  |
| Re(3)-S(3)    | 2.404(2)  |
| Re(3)-S(4)#1  | 2.412(2)  |



|               |            |
|---------------|------------|
| Re(3)-S(2)    | 2.412(2)   |
| Re(3)-Re(2)#1 | 2.5876(5)  |
| Re(3)-Re(1)#1 | 2.5876(5)  |
| S(1)-Re(3)#1  | 2.403(2)   |
| S(3)-Re(2)#1  | 2.406(2)   |
| S(4)-Re(2)#1  | 2.409(2)   |
| S(4)-Re(3)#1  | 2.412(2)   |
| Pb(1)-I(3)    | 2.9281(11) |
| Pb(1)-I(4)    | 3.1232(12) |
| Pb(1)-I(4)#2  | 3.1345(12) |
| Pb(1)-I(1)    | 3.2389(10) |
| Pb(1)-I(2)    | 3.3101(9)  |
| Pb(2)-O(41)   | 2.577(9)   |
| Pb(2)-O(41)#3 | 2.577(9)   |
| Pb(2)-I(2)    | 3.2085(8)  |
| Pb(2)-I(2)#3  | 3.2086(8)  |
| Pb(2)-I(1)#3  | 3.2540(9)  |
| Pb(2)-I(1)    | 3.2540(9)  |
| I(4)-Pb(1)#2  | 3.1345(12) |

---

Symmetry transformations used to generate equivalent atoms:

#1 -x,-y+1,-z+1 #2 -x+2,-y,-z #3 -x+2,-y+1,-z
